# Supplementary material for: Simple Skeletal Muscle Mass Estimation Formulas: What We Can Learn From Them
Source: Front Endocrinol (Lausanne). 2020 Feb 5;11:31. doi: 10.3389/fendo.2020.00031 (PMC7012897; doi:10.3389/fendo.2020.00031)
Supplement: Supplementary file 1 [file Table_1.xlsx]

## Sheet: SM Estimation
	Enter data only into yellow cells
		Units	metric		Units	US
	Age	Years	25		Years	25
	Weight	kg	79.9		Pounds	175.78
	Height	cm	178		Inches	70.0787
	Waist Circumference	cm	80.6		Inches	31.7323
	Skeletal Muscle Mass	kg	kg	% of BW	% of BW
		Model 1	Model 2	Model 1	Model 2
	NH White Man	30.225	32.8269	37.8285	41.085
	NH Black Man	33.0074	34.4749	41.3109	43.1475
	NH White Woman	23.4987	24.0663	29.4101	30.1205
	NH Black Woman	25.9571	26.4004	32.487	33.0418
	BMI	kg/m2	25.2178

## Sheet: Results
Skeletal Muscle Mass	kg	kg	% of BW	% of BW		Skeletal Muscle Mass	pounds	pounds
	Model 1	Model 2	Model 1	Model 2			Model 1	Model 2
NH White Man	30.225	32.8269	37.8285	41.085		NH White Man	66.4949	72.2192
NH Black Man	33.0074	34.4749	41.3109	43.1475		NH Black Man	72.6163	75.8447
NH White Woman	23.4987	24.0663	29.4101	30.1205		NH White Woman	51.6971	52.9459
NH Black Woman	25.9571	26.4004	32.487	33.0418		NH Black Woman	57.1056	58.0808
Calculations	Conversion to metric
Age	Years	25
Weight	kg	79.9
Height	cm	178
Waist Circumference	cm	80.6
Body Mass Index	kg/m^2	25.2178
Waist Circumference	cm	Inches
NH White Man	89.8865	35.3884
NH Black Man	85.3923	33.619
NH White Woman	89.2397	35.1337
NH Black Woman	88.3198	34.7716

## Sheet: Reference Man-Woman
	Man		Woman
	US	Metric	US	Metric
Age	25		25
Weight	154	70	132	60
Height	66.94	170	63	160
WC	33.6	85.4	31.4	79.8
BMI		24.2	23.4

## Sheet: Model 1
	1,1	1,2	2,1	2,2
I	-13.1475	-14.7911	-9.02893	-9.58282
W	0.234442	0.25867	0.189415	0.214442
H	0.148168	0.162377	0.110109	0.119941
A	-0.0575576	-0.0539361	-0.0950022	-0.132297
A^2	-0.000471227	-0.000678476	0.000270585	0.000582335
age	25
weight	79.9
height	178
BMI	25.2178
	kg	%
WM	30.225	37.8285
BM	33.0074	41.3109
WF	23.4987	29.4101
BF	25.9571	32.487

## Sheet: Model 2
	NHWM	NHWW	NHBM	NHBW
Intercept	13.8441	-3.85776	13.3433	-4.90615
bmxwt	0.454789	0.237433	0.495471	0.256419
bmxht	0.0313016	0.0900563	0.0336644	0.102076
RIDAGEYR	0.0130998	-0.0971593	0.031395	-0.123811
age2	-0.000626503	0.000381409	-0.000807023	0.000585996
bmxwaist	-0.283653	-0.060624	-0.306816	-0.057343
age	25
weight	79.9
height	178
WC	80.6
BMI	25.2178
	SM
WM	32.8269
BM	34.4749
WF	24.0663
BF	26.4004

## Sheet: Model 3
WM
Intercept	95.769
bmxwt	0.779364	79.9
bmxht	-0.410187	178
RIDAGEYR	0.194386	25
	WC	89.8865	cm
		35.3884	inches
WF
Intercept	84.1105
bmxwt	0.785054
bmxht	-0.34447
RIDAGEYR	0.148758
	WC	89.2397	cm
		35.1337	inches
BM
Intercept	92.1316	85.3923	cm
bmxwt	0.772812	33.619	inches
bmxht	-0.418579
RIDAGEYR	0.240804
BF
Intercept	81.5164	88.3198	cm
bmxwt	0.731879	34.7716	inches
bmxht	-0.311902
RIDAGEYR	0.153786
